# Supplementary material for: Milk Allergen Micro-Array (MAMA) for Refined Detection of Cow’s-Milk-Specific IgE Sensitization
Source: MDPI journal article supplement (doi:10.3390/nu15102401), 2023-05-21
Supplement: s1 [file s1]

## Supplementary materials

**Table S1.** Sources, sequences and characteristics of allergens and peptides of MAMA.

| Name                              | Proteins                                                                                                                                                                                                                                                         |                                                                                                                             |
|-----------------------------------|------------------------------------------------------------------------------------------------------------------------------------------------------------------------------------------------------------------------------------------------------------------|-----------------------------------------------------------------------------------------------------------------------------|
| <b>n<math>\alpha</math>-cas</b>   | $\alpha$ -casein from bovine milk                                                                                                                                                                                                                                | Sigma (C6780)                                                                                                               |
| <b>n<math>\beta</math>-cas</b>    | $\beta$ -casein from bovine milk                                                                                                                                                                                                                                 | Sigma (C6905)                                                                                                               |
| <b>n<math>\kappa</math>-cas</b>   | $\kappa$ -casein from bovine milk                                                                                                                                                                                                                                | Sigma (C0406)                                                                                                               |
| <b>nALA</b>                       | $\alpha$ -lactalbumin from bovine milk                                                                                                                                                                                                                           | Sigma (L5385)                                                                                                               |
| <b>nBLG</b>                       | $\beta$ -lactoglobulin from bovine milk                                                                                                                                                                                                                          | Sigma (L3908)                                                                                                               |
| <b>nBSA</b>                       | Bovine serum albumin                                                                                                                                                                                                                                             | Sigma (A2058)                                                                                                               |
| <b>nLf</b>                        | Lactoferrin from bovine milk                                                                                                                                                                                                                                     | Sigma (L9507)                                                                                                               |
| <b>r<math>\alpha</math>S1-cas</b> | MRPKHPIKHQ GLPQEVLENEN LLRFFVAPFP EVFGKEKVNE LSKDIGSEST<br>EDQAMEDIKQMEAESISSSE EIVPNSVEQK HIQKEDVPSE RYLGYLEQLL<br>RLKKYKVPQL EIVPNSAEERLHSMKEGIHA QKKEPMIGVN QELAYFYPEL<br>FRQFYQLDAY PSGAWYYVPL GTQYTDAPSFSDIPNPIGSE NSEKTTMPLW<br><b>HHHHHH</b>              | GenBank: EU221551.1 and<br>ABW98936.1; <i>E. coli</i> BL21-<br>expressed; [33]                                              |
| <b>r<math>\alpha</math>S2-cas</b> | MKNTMEHVSS SEESIISQET YKQEKMAIN PSKENLCSTF<br>CKEVRNANEEESIGSSSE ESEAVATEEV KITVDDKHYQ KALNEINQFY<br>QKFPQYLQYLYQGPIVLNPW DQVKRNAVPI TPTLNREQLS TSEENSKKT<br>DMESTEVFTKKTKLTEEEKN RLNFKKISQ RYQKFALPQY LKTVYQHQA<br>MKPWIQPKTK VIPYVRYL <b>HHHHHH</b>            | <i>E. coli</i> BL21-expressed; [9]                                                                                          |
| <b>r<math>\beta</math>-cas</b>    | MRELEELNVP GEIVESLSSS EESITRINKK IEKFQSEEQQ QTEDELQDKI<br>HPFAQTQSLV YPFPGPPIPS LPQNIPPLTQ TPVVVPPFLQ PEVMGVSKVK<br>EAMAPKHKEM PFPKYPVEPF TESQSLTLTD VENLHLPLPL LQSWMHQPHQ<br>PLPPTVMFPP QSVLSLSQSK VLPVPQKAVP YPQRDMPIQA FLLYQEPVLG<br>PVRGPFPIIV <b>HHHHHH</b> | <i>E. coli</i> BL21-expressed; [9]                                                                                          |
| <b>r<math>\kappa</math>-cas</b>   | MQEQNQEQPI RCEKDERFFS DKIAKYIPIQ YVLSRYPSYG LNYQQKPVA<br>LINNQFLPYP YYAKPAAVRS PAQILQWQVL SNTVPAKSCQ AQPTTMARHP<br>HPHLSFMAIP PKNQDKTEI PTINTIASGE PTSTPTIEAV ESTVATLEAS PEVIESPPEI<br>NTVQVTSTAV <b>HHHHHH</b>                                                  | <i>E. coli</i> BL21-expressed; [9]                                                                                          |
| <b>rALA</b>                       | MEQLTKCEVF RELKDLKGYG GVSLPEWVCT TFHTSGYDTQ AIVQNNSTE<br>YGLFQINNKI WCKDDQNPBS SNICNISCDK FLDDDLTDDI MCVKKILDKV<br>GINYWLAHKA LCSEKLDQWL CEKL <b>HHHHHH</b>                                                                                                      | NCBI Reference Sequence:<br>NP_776803.1 (mature<br>protein w/o leader<br>sequence), <i>E. coli</i> BL21-<br>expressed; [34] |
| <b>rBSAF1</b>                     | MRGVFRRDTH KSEIAHRFKD LGEHFKGLV LIAFSQYLQQ CPFDEHVKL<br>NELTEFAKTC VADESHAGCE KSLHTLFGDE LCKVASLRET<br>YGDMA DCCEKQEPERNECFL SHKDDSPDLP KLKPDNTLC DEFKADEKKF<br>WGKLYEIA RHPYFYAPEL LYYANKYNGV FQECCQAEDK GACLLPKIET<br>MREKVLTS <b>HHHHHH</b>                   | AA 1 – 199 [GenBank:<br>AAA51411.1]                                                                                         |
| <b>rBSAF2</b>                     | MARQLRCAS IQKFGERALK AWSVARLSQK FPKAEFVEVT KLVTDLTKVH<br>KECCHGDLLE CADDRADLAK YICDNQDTIS SKLKECCDKP LLEKSHCIAE                                                                                                                                                  | AA 200 – 389 [GenBank:<br>AAA51411.1]                                                                                       |

|               |                                                                                                                                                                                                                                                  |                                           |
|---------------|--------------------------------------------------------------------------------------------------------------------------------------------------------------------------------------------------------------------------------------------------|-------------------------------------------|
|               | VEKDAIPENL PPLTADFAED KDVCKNYQEA KDAFLGSFLY EYSRRHPEYA<br>VSVLLRLAKE YEATLEECCA KDDPHACYST VFDKLKHLVDE HHHHHH                                                                                                                                    |                                           |
| <b>rBSAF3</b> | MPQNLIKQNC DQFEKLGEYG FQNALIVRYT RKVPQVSTPT LVEVSRSLGK<br>VGTRCCTKPE SERMPCTEDY LSLILNRLCV LHEKTPVSEK VTKCCTESLV<br>NRRPCFSALT PDETYVPKAF DEKLFTFHAD ICTLPDTEKQ IKKQTALVEL<br>LKHKPKATEE QLKTMENFV AFVDKCCAAD DKEACFAVEG PKLVVSTQTA LA<br>HHHHHH | AA 390 – 591 [GenBank:<br>AAA51411.1]     |
| <b>Name</b>   | <b>Peptides</b>                                                                                                                                                                                                                                  |                                           |
| <b>Cas1</b>   | RPKHPIKHQG LPQEVLENENL LRFFVAPFPE VC                                                                                                                                                                                                             | AA 2 - 32 + 1 Cys [33]                    |
| <b>Cas2</b>   | FGKEKVNELS KDIGSESTED QAMEDIKQME AESC                                                                                                                                                                                                            | AA 33 - 65 + 1 Cys [33]                   |
| <b>Cas3</b>   | ISSSEEIVPN SVEQKHIQKE DVPSERYLGY EQLLRC                                                                                                                                                                                                          | AA 34 - 95, 97-101 + 1 Cys<br>[33]        |
| <b>Cas4</b>   | CLKKYKVPQL EIVPNSAEER LHSMKEGIHA QQKE                                                                                                                                                                                                            | 1 Cys + AA 102 – 134 [33]                 |
| <b>Cas5</b>   | CPMIGVNQEL AYFYPELFRQ FYQLDAYPSG AWYYV                                                                                                                                                                                                           | 1 Cys + AA 135 – 168 [33]                 |
| <b>Cas6</b>   | PLGTQYTDAP SFS DIPNPIG SENSEKTTMP LWC                                                                                                                                                                                                            | AA 169 – 200 + 1 Cys [33]                 |
| <b>Casb1</b>  | HQPHQPLPPT V                                                                                                                                                                                                                                     | AA 146 – 156 [GenBank:<br>XP_005902099.2] |
| <b>Casb2</b>  | VYPFPGPIPN                                                                                                                                                                                                                                       | AA 60 – 69 [GenBank:<br>XP_005902099.2]   |
| <b>Casb3</b>  | LSSSEE                                                                                                                                                                                                                                           | AA 17 – 21 [GenBank:<br>XP_005902099.2]   |
| <b>Casb4</b>  | PVVVPPFL                                                                                                                                                                                                                                         | AA 82 – 89 [GenBank:<br>XP_005902099.2]   |
| <b>Lac1</b>   | EQLTKCEVFR ELKDLKGYG                                                                                                                                                                                                                             | AA 2 – 20 [34]                            |
| <b>Lac2</b>   | LKGYGGSVSLP EWWCTTFHT S                                                                                                                                                                                                                          | AA 16 – 35 [34]                           |
| <b>Lac3</b>   | TFHTSGYDTQ AIVQNNDSTE                                                                                                                                                                                                                            | AA 31 – 50 [34]                           |
| <b>Lac4</b>   | NDSTEYGLFQ INNKIWCKDD                                                                                                                                                                                                                            | AA 46 – 65 [34]                           |
| <b>Lac5</b>   | WCKDDQNPHS SNICNISCDK                                                                                                                                                                                                                            | AA 61 – 80 [34]                           |
| <b>Lac6</b>   | ISCDKFLDDD LTDDIMCVKK                                                                                                                                                                                                                            | AA 76 – 95 [34]                           |
| <b>Lac7</b>   | MCVKKILDKV GINYWLAHKA                                                                                                                                                                                                                            | AA 91 – 110 [34]                          |
| <b>Lac8</b>   | LAHKALCSEK LDQWLCEKL                                                                                                                                                                                                                             | AA 106 – 124 [34]                         |
| <b>BLG1</b>   | LIVTQTMKGL DIQKVA                                                                                                                                                                                                                                | AA 2 – 17 [GenBank:<br>CAA32835.1]        |
| <b>BLG2</b>   | IQKVAGTWYS LAMAASDISL                                                                                                                                                                                                                            | AA 13 – 32 [GenBank:<br>CAA32835.1]       |
| <b>BLG3</b>   | SDISLLDAQS APLRVYVEEL                                                                                                                                                                                                                            | AA 28 – 47 [GenBank:<br>CAA32835.1]       |
| <b>BLG4</b>   | YVEELKPTPE GDLEILLQKW                                                                                                                                                                                                                            | AA 43 – 62 [GenBank:<br>CAA32835.1]       |

|                |                       |                                    |
|----------------|-----------------------|------------------------------------|
| <b>BLG5</b>    | LLQKWENGEC AQKKIAEKT  | AA 58 – 77 [GenBank: CAA32835.1]   |
| <b>BLG6</b>    | IAEKTIPAV FKIDALNENK  | AA 73 – 92 [GenBank: CAA32835.1]   |
| <b>BLG7</b>    | LNENKVLVD TDYKYYLLFC  | AA 88 – 107 [GenBank: CAA32835.1]  |
| <b>BLG8</b>    | YLLFCMENZA EPEQSLACQC | AA 103 – 122 [GenBank: CAA32835.1] |
| <b>BLG9</b>    | LACQCLVRTP EVDDEALEKF | AA 118 – 137 [GenBank: CAA32835.1] |
| <b>BLG9iso</b> | LVCQCLVRTP EVDDEALEKF | AA 123 – 142 [GenBank: CAA32835.1] |
| <b>BLG10</b>   | ALEKFDKALK ALPMHIRLSF | AA 133 – 152 [GenBank: CAA32835.1] |
| <b>BLG11</b>   | IRLSFNPTQL EEQCHI     | AA 148 – 163 [GenBank: CAA32835.1] |

#### References :

33. Schulmeister, U.; Hochwallner, H.; et al. Cloning, expression, and mapping of allergenic determinants of alphaS1-casein, a major cow's milk allergen. *J Immunol.* 2009 Jun 1;182(11):7019-29. doi: 10.4049/jimmunol.0712366.
9. Hochwallner, H.; Schulmeister, U.; Swoboda, I.; Balic, N.; Geller, B.; Nystrand, M.; Härlin, A.; Thalhamer, J.; Scheiblhofer, S.; Niggemann, B.; Quirce, S.; Ebner, C.; Mari, A.; Pauli, G.; Herz, U.; van Tol, E.A.; Valenta, R.; Spitzauer, S. Microarray and allergenic activity assessment of milk allergens. *Clin Exp Allergy.* 2010 Dec;40(12):1809-18. doi: 10.1111/j.1365-2222.2010.03602.x.
34. Hochwallner, H.; Schulmeister, U.; et al. Visualization of clustered IgE epitopes on alpha-lactalbumin. *J Allergy Clin Immunol.* 2010 Jun;125(6):1279-1285.e9. doi: 10.1016/j.jaci.2010.03.007.

**Table S2.** Detailed statistical analysis of differences of median IgE levels specific for CM allergens and CM allergen-derived peptides in patients with anaphylaxis according Sampson's criteria 4-5 (A4-5 patients), with anaphylaxis according to Sampson's criteria 1-3 (A1-3 patients) and without anaphylaxis (NA patients). Highly significant differences (p-value <0.01) are indicated in red.

| Allergen          | Without anaphylaxis<br>(n=20) | Sampson 1-3 (n=21)   | Sampson 4-5 (n=20)    | p-value (<0.01) |            |             | p-value (<0.001) |            |            |
|-------------------|-------------------------------|----------------------|-----------------------|-----------------|------------|-------------|------------------|------------|------------|
|                   |                               |                      |                       | A1-3 vs A4-5    | A1-3 vs NA | A 4-5 vs NA | A1-3 vs A4-5     | A1-3 vs NA | A4-5 vs NA |
| n $\alpha$ -cas   | 0.214 [0.117; 0.995]          | 0.281 [0.092; 2.168] | 4.342 [1.324; 36.483] | .000            | .602       | .000        | .000             | .602       | .000       |
| r $\alpha$ S1-cas | 0.106 [0.052; 0.676]          | 0.260 [0.043; 2.169] | 3.956 [0.945; 32.265] | .000            | .434       | .000        | .000             | .434       | .000       |
| r $\alpha$ S2-cas | 0.027 [0.004; 0.136]          | 0.137 [0.012; 2.824] | 1.346 [0.359; 8.271]  | .032            | .067       | .000        | .032             | .067       | .000       |
| n $\beta$ -cas    | 0.067 [0.012; 0.369]          | 0.086 [0.024; 1.428] | 3.546 [0.609; 19.604] | .000            | .657       | .000        | .000             | .657       | .000       |
| r $\beta$ -cas    | 0.019 [0.005; 0.203]          | 0.035 [0.006; 0.632] | 3.283 [0.312; 26.105] | .000            | .473       | .000        | .000             | .473       | .000       |
| n $\kappa$ -cas   | 0.143 [0.055; 0.607]          | 0.267 [0.033; 1.664] | 4.331 [1.562; 23.495] | .000            | .611       | .000        | .000             | .611       | .000       |
| r $\kappa$ -cas   | 0.079 [0.035; 0.244]          | 0.107 [0.016; 0.282] | 2.243 [0.36; 10.327]  | .000            | .990       | .000        | .000             | .990       | .000       |
| nALA              | 0.359 [0.156; 2.978]          | 0.693 [0.294; 2.893] | 4.743 [1.75; 21.812]  | .001            | .211       | .000        | .001             | .211       | .000       |
| rALA              | 0.087 [0.036; 0.645]          | 0.274 [0.063; 0.565] | 1.533 [0.337; 7.892]  | .003            | .155       | .000        | .003             | .155       | .000       |
| nBLG              | 0.488 [0.116; 1.278]          | 0.565 [0.147; 1.596] | 3.564 [0.983; 23.515] | .003            | .584       | .000        | .003             | .584       | .000       |
| nLf               | 0.020 [0.007; 0.178]          | 0.027 [0; 0.099]     | 0.027 [0.006; 0.097]  | .743            | .628       | .882        | .743             | .628       | .882       |
| nBSA              | 0.301 [0.064; 1.595]          | 0.478 [0.036; 6.313] | 1.489 [0.107; 16.36]  | .206            | .979       | .185        | .206             | .979       | .185       |
| rBSAF1            | 0.000 [0; 0.054]              | 0.009 [0; 0.162]     | 0.038 [0; 0.802]      | .192            | .385       | .059        | .192             | .385       | .059       |
| rBSAF2            | 0.029 [0.004; 0.069]          | 0.038 [0; 0.355]     | 0.039 [0.008; 0.632]  | .386            | .793       | .232        | .386             | .793       | .232       |
| rBSAF3            | 0.012 [0; 0.151]              | 0.027 [0.005; 0.288] | 0.202 [0.017; 1.015]  | .200            | .332       | .029        | .200             | .332       | .029       |
| Cas1              | 0.047 [0.001; 0.5]            | 0.037 [0; 1.74]      | 1.862 [0.475; 37.174] | .002            | .625       | .000        | .002             | .625       | .000       |
| Cas2              | 0.029 [0.005; 0.113]          | 0.031 [0; 1.001]     | 1.104 [0.247; 9.616]  | .001            | .793       | .000        | .001             | .793       | .000       |
| Cas3              | 0.156 [0.035; 0.527]          | 0.286 [0.003; 2.577] | 3.935 [1.173; 22.042] | .002            | .794       | .000        | .002             | .794       | .000       |
| Cas4              | 0.077 [0.005; 0.556]          | 0.200 [0; 1.434]     | 4.460 [0.771; 26.506] | .000            | .753       | .000        | .000             | .753       | .000       |
| Cas5              | 0.000 [0; 0]                  | 0.000 [0; 0]         | 0.000 [0; 0.009]      | .003            | .311       | .016        | .003             | .311       | .016       |

|         |                      |                      |                       |      |       |      |      |       |      |
|---------|----------------------|----------------------|-----------------------|------|-------|------|------|-------|------|
| Cas6    | 0.027 [0.006; 0.488] | 0.111 [0.011; 1.502] | 4.132 [0.516; 23.649] | .001 | .375  | .000 | .001 | .375  | .000 |
| Casb1   | 0.004 [0.002; 0.005] | 0.002 [0; 0.003]     | 0.003 [0.002; 0.004]  | .111 | .026  | .507 | .111 | .026  | .507 |
| Casb2   | 0.004 [0.001; 0.01]  | 0.012 [0; 0.048]     | 0.047 [0.006; 1.41]   | .039 | .416  | .002 | .039 | .416  | .002 |
| Casb3   | 0.000 [0; 0]         | 0.000 [0; 0.002]     | 0.000 [0; 0.004]      | .823 | .226  | .196 | .823 | .226  | .196 |
| Casb4   | 0.001 [0; 0.004]     | 0.000 [0; 0.002]     | 0.001 [0; 0.012]      | .420 | .576  | .719 | .420 | .576  | .719 |
| Lac1    | 0.000 [0; 0.017]     | 0.000 [0; 0.255]     | 0.094 [0.009; 0.567]  | .143 | .166  | .001 | .143 | .166  | .001 |
| Lac2    | 0.000 [0; 0.001]     | 0.000 [0; 0.027]     | 0.002 [0; 0.024]      | .250 | .593  | .069 | .250 | .593  | .069 |
| Lac3    | 0.000 [0; 0.002]     | 0.000 [0; 0.002]     | 0.000 [0; 0.002]      | .933 | .406  | .464 | .933 | .406  | .464 |
| Lac4    | 0.004 [0; 0.014]     | 0.000 [0; 0.01]      | 0.000 [0; 0.012]      | .899 | .275  | .321 | .899 | .275  | .321 |
| Lac5    | 0.040 [0; 0.07]      | 0.000 [0; 0.07]      | 0.000 [0; 0.072]      | .656 | .344  | .103 | .656 | .344  | .103 |
| Lac6    | 0.000 [0; 0]         | 0.000 [0; 0.027]     | 0.000 [0; 0.004]      | .206 | .082  | .657 | .206 | .082  | .657 |
| Lac7    | 0.000 [0; 0.022]     | 0.000 [0; 0.014]     | 0.000 [0; 0]          | .255 | .712  | .182 | .255 | .712  | .182 |
| Lac8    | 0.000 [0; 0.013]     | 0.000 [0; 0.008]     | 0.000 [0; 0.012]      | .859 | 1.000 | .852 | .859 | 1.000 | .852 |
| BLG1    | 0.000 [0; 0.004]     | 0.000 [0; 0.005]     | 0.000 [0; 0.01]       | .493 | .953  | .548 | .493 | .953  | .548 |
| BLG2    | 0.001 [0; 0.003]     | 0.002 [0; 0.007]     | 0.004 [0; 0.007]      | .744 | .296  | .109 | .744 | .296  | .109 |
| BLG3    | 0.000 [0; 0.001]     | 0.000 [0; 0.002]     | 0.001 [0; 0.006]      | .521 | .296  | .103 | .521 | .296  | .103 |
| BLG4    | 0.020 [0.002; 0.092] | 0.072 [0; 0.674]     | 0.922 [0.024; 3.544]  | .020 | .415  | .003 | .020 | .415  | .003 |
| BLG5    | 0.021 [0; 0.076]     | 0.000 [0; 0.029]     | 0.000 [0; 0.008]      | .275 | .107  | .018 | .275 | .107  | .018 |
| BLG6    | 0.004 [0; 0.026]     | 0.008 [0; 0.422]     | 0.059 [0.014; 0.46]   | .053 | 1.000 | .009 | .053 | 1.000 | .009 |
| BLG7    | 0.000 [0; 0.009]     | 0.000 [0; 0.004]     | 0.000 [0; 0.011]      | .697 | .635  | .557 | .697 | .635  | .557 |
| BLG8    | 0.000 [0; 0.001]     | 0.001 [0; 0.003]     | 0.001 [0; 0.011]      | .874 | .078  | .122 | .874 | .078  | .122 |
| BLG9    | 0.000 [0; 0.003]     | 0.002 [0; 0.039]     | 0.058 [0; 2.366]      | .044 | .128  | .002 | .044 | .128  | .002 |
| BLG9iso | 0.000 [0; 0.001]     | 0.00 [0; 0]          | 0.000 [0; 0.003]      | .525 | .411  | .899 | .525 | .411  | .899 |
| BLG10   | 0.003 [0.001; 0.005] | 0.005 [0.002; 0.043] | 0.032 [0.007; 0.312]  | .060 | .026  | .000 | .060 | .026  | .000 |
| BLG11   | 0.000 [0; 0.01]      | 0.004 [0; 0.23]      | 0.006 [0; 3.465]      | .336 | .178  | .027 | .336 | .178  | .027 |

6

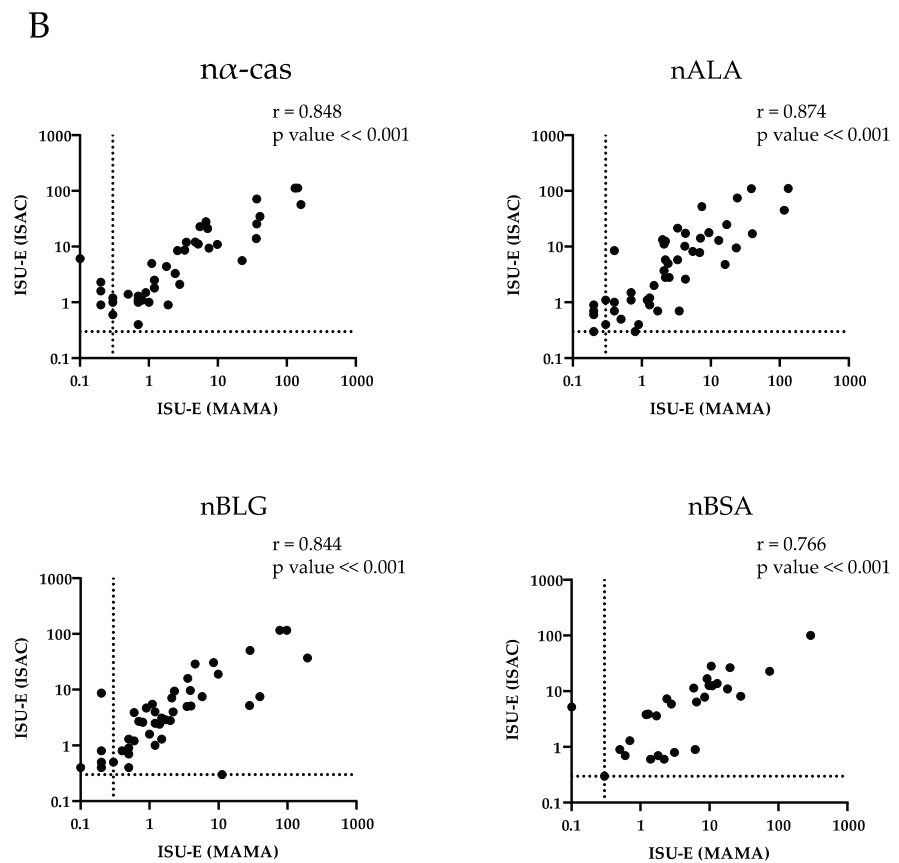

**Figure S1.** Heat map (A) and correlation (B) of IgE levels (ISU-E) specific for cow's milk allergen molecules (n $\alpha$ -cas, nAla, nBLG, nBSA) as determined by MAMA (x-axes) versus ImmunoCAP ISAC (y-axes).
